# Supplementary material for: TLK1‐mediated MK5‐S354 phosphorylation drives prostate cancer cell motility and may signify distinct pathologies
Source: PubMed Central journal article supplement (PMC9251878; doi:10.1002/1878-0261.13183), 2022-02-03

## Supplementary Figure: S1

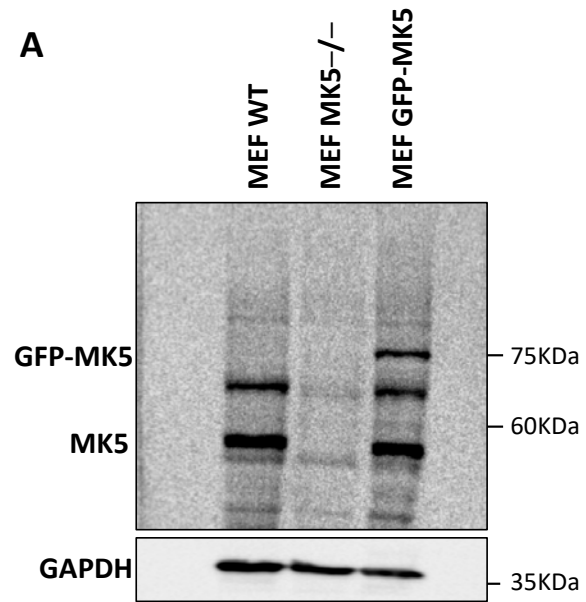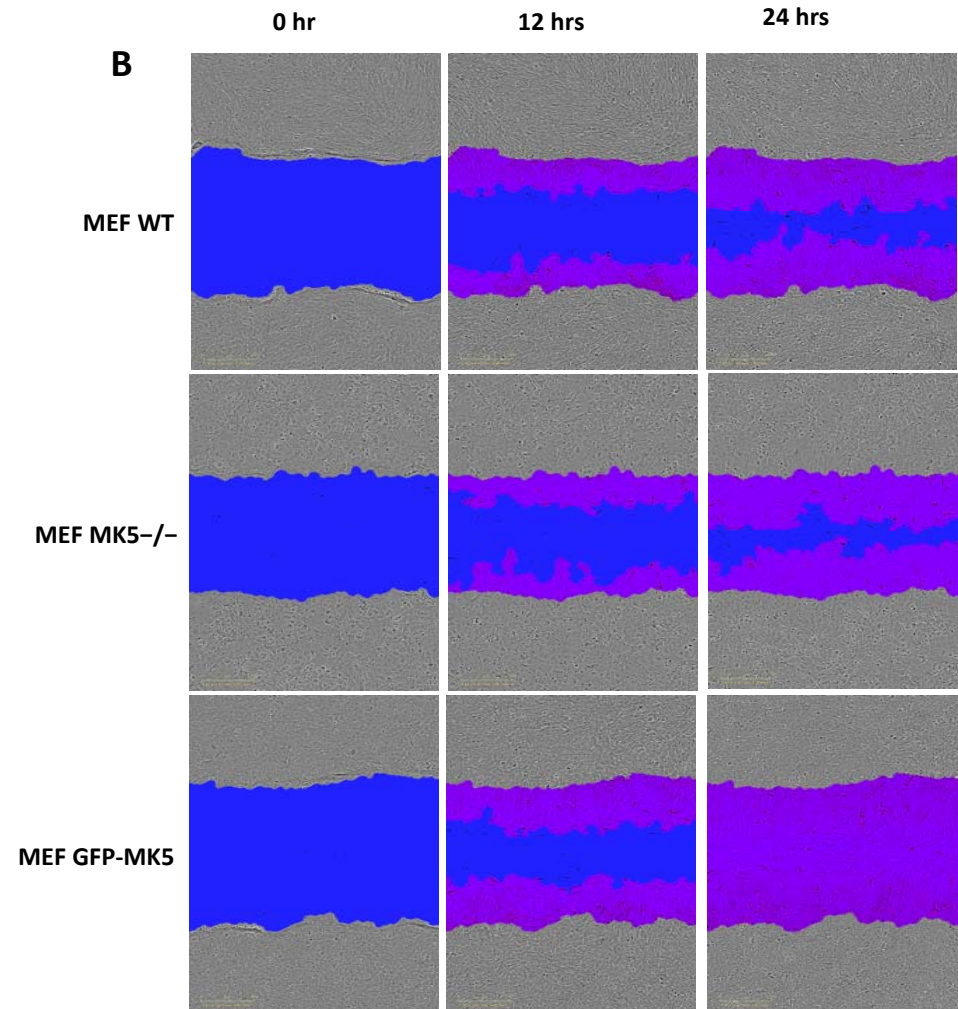

Supplementary Figure: S2

A

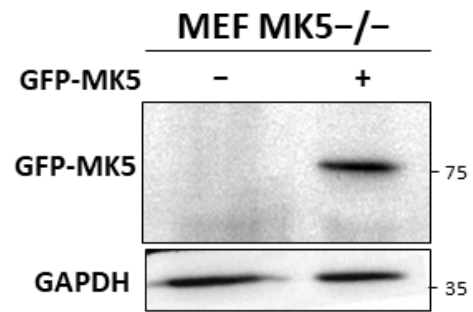

B

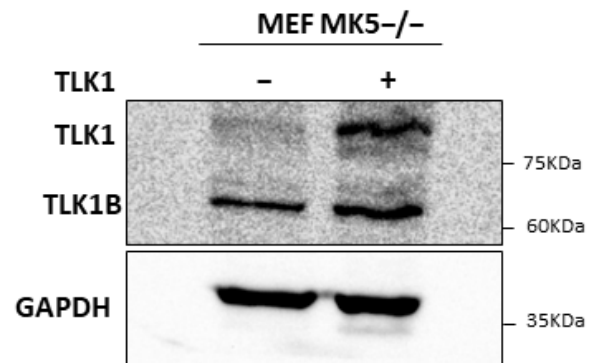

C

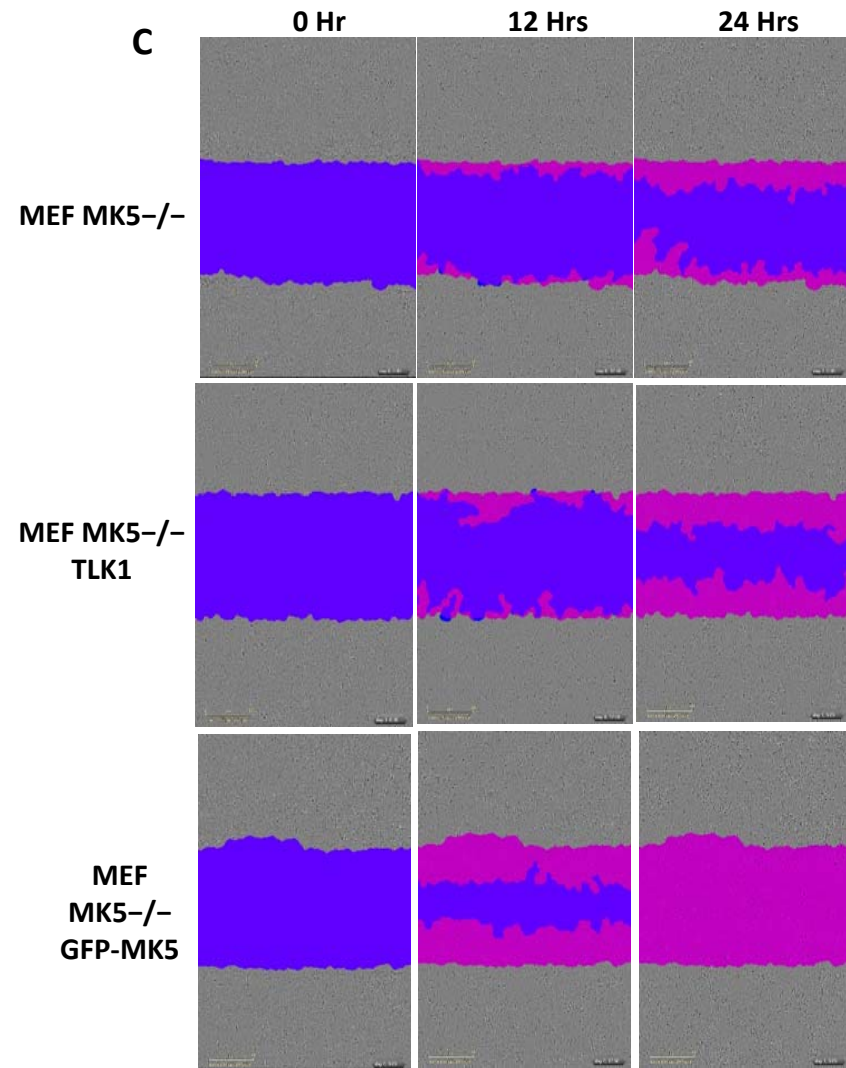

### Supplementary Figure: S3

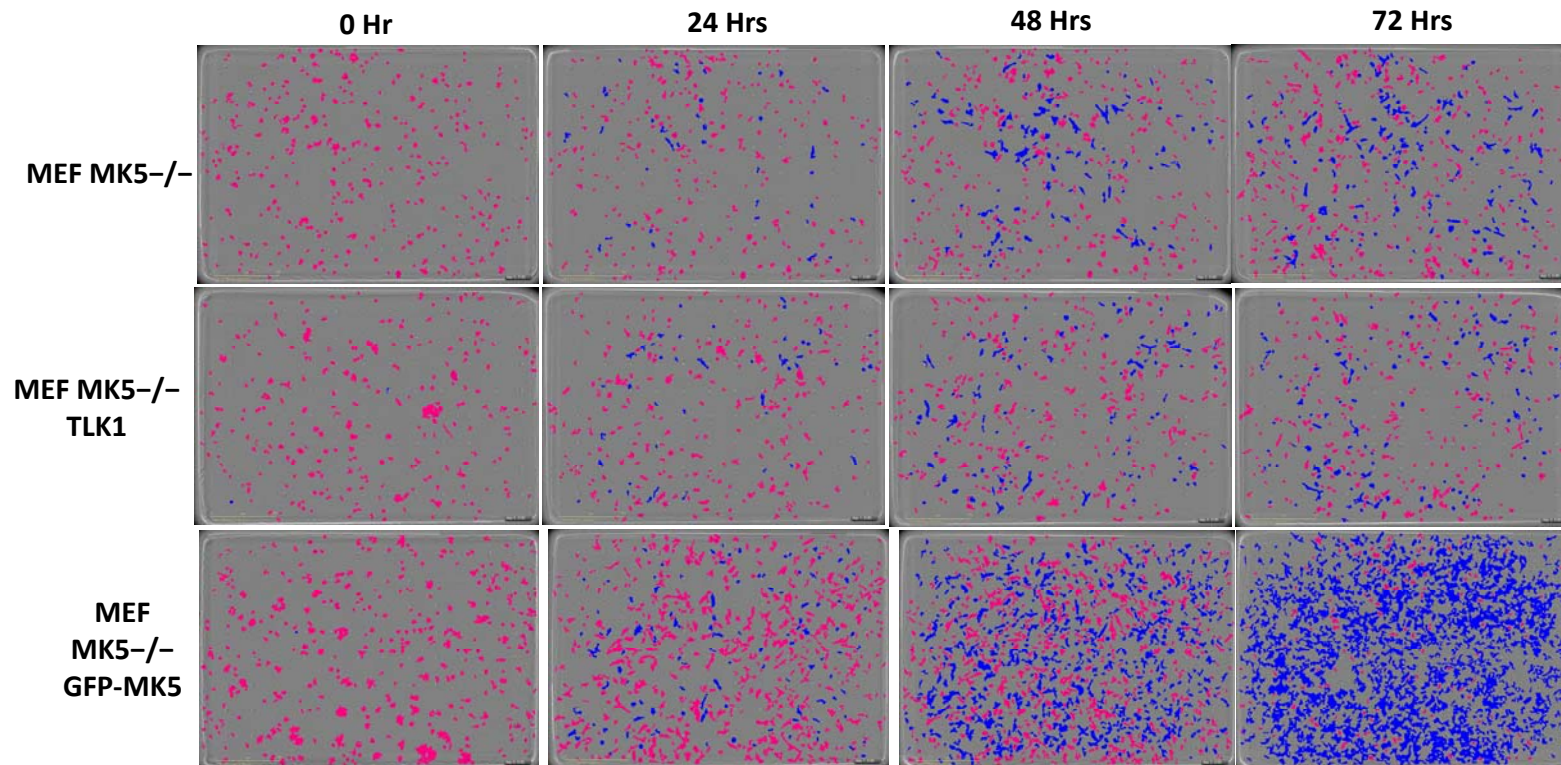

### Supplementary Figure: S4

**A**

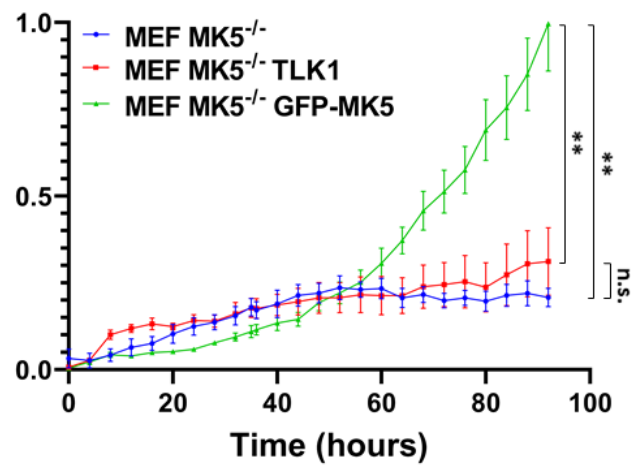

**B**

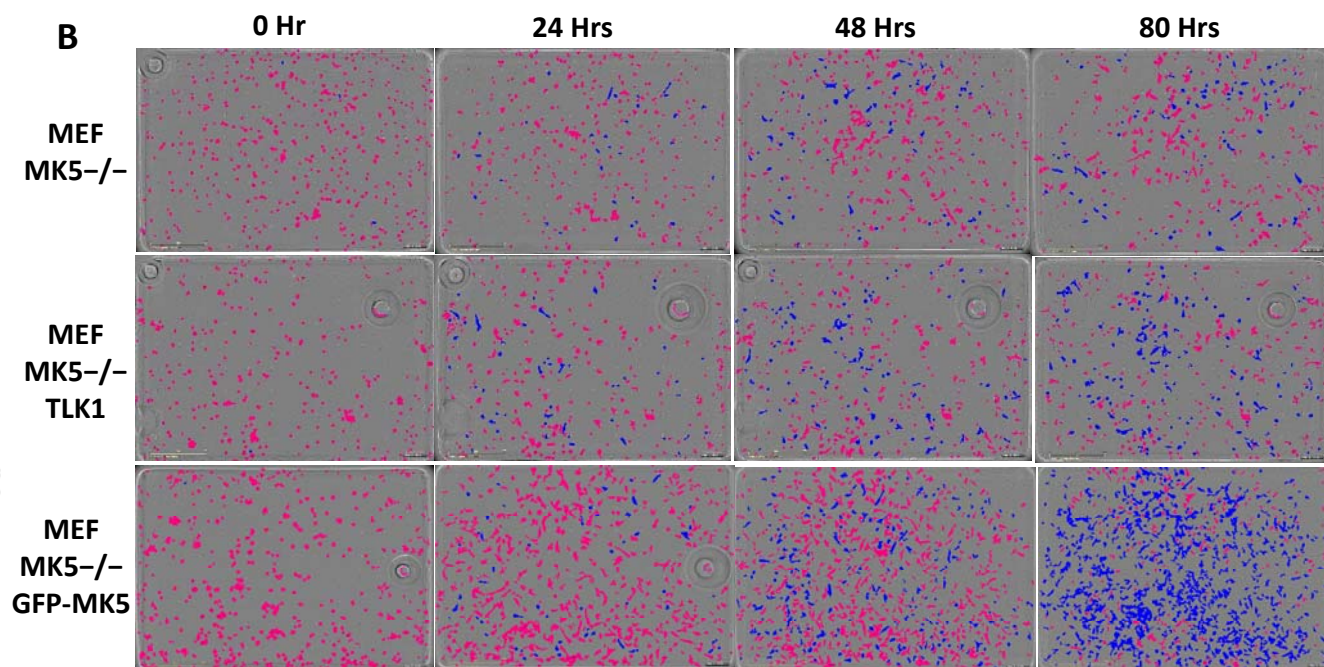

### Supplementary Figure: S5

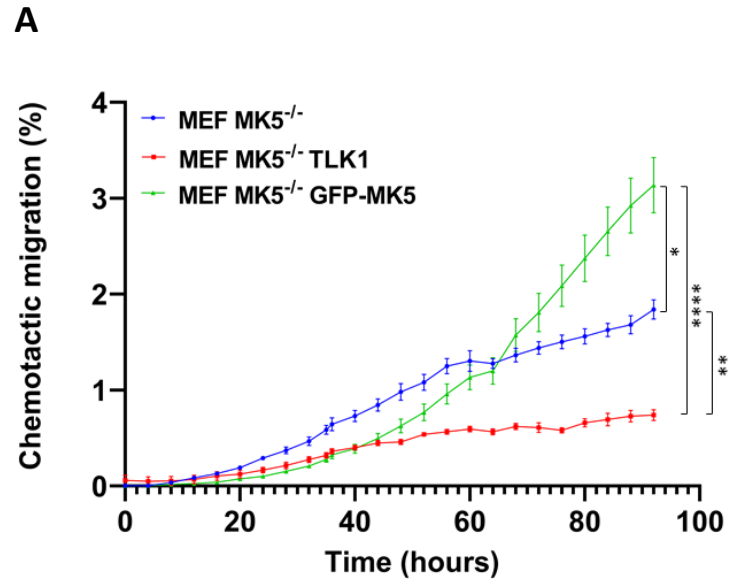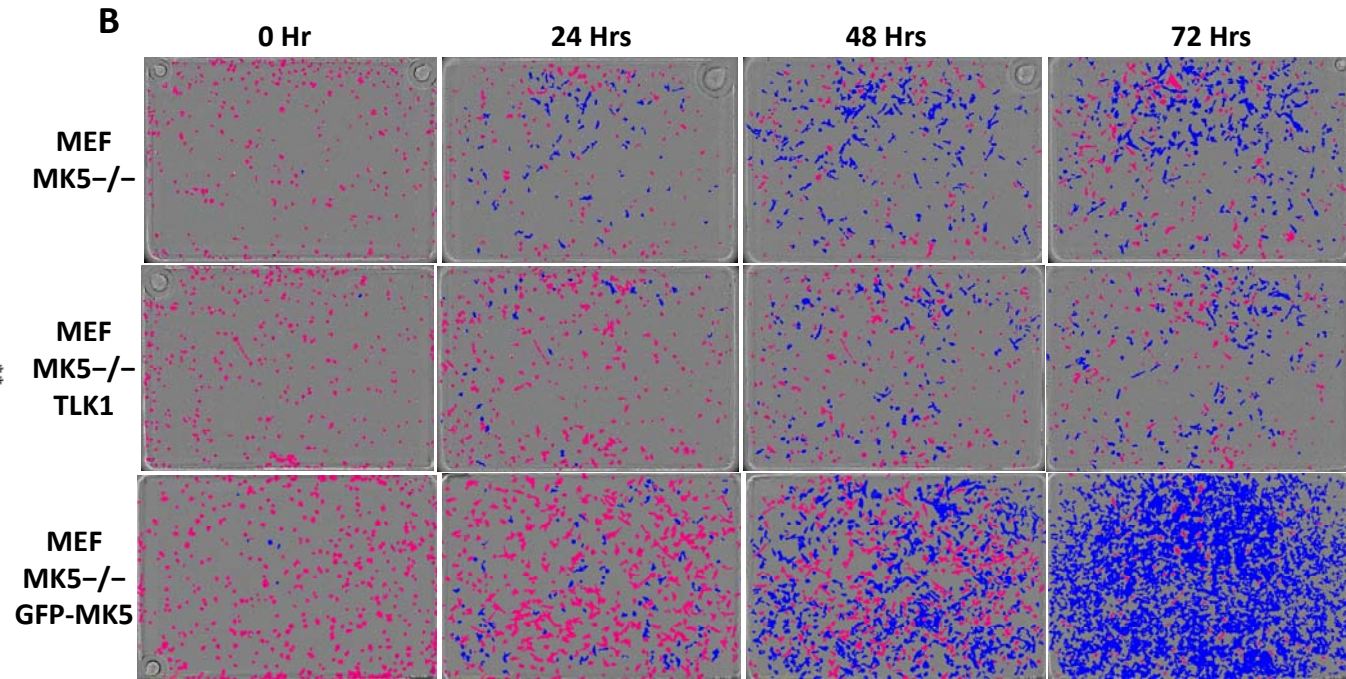

Supplementary Figure: S6

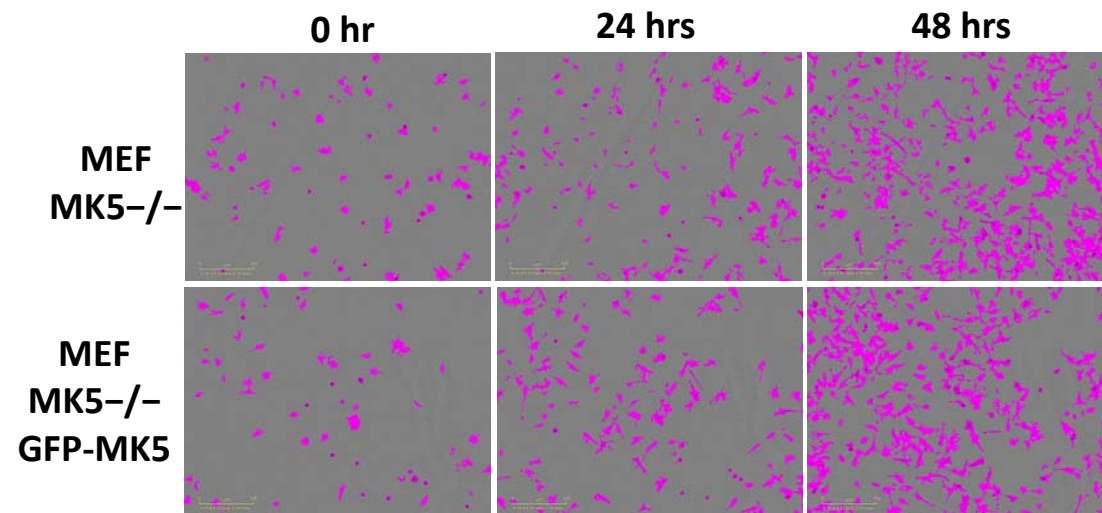

Supplementary Figure: S7

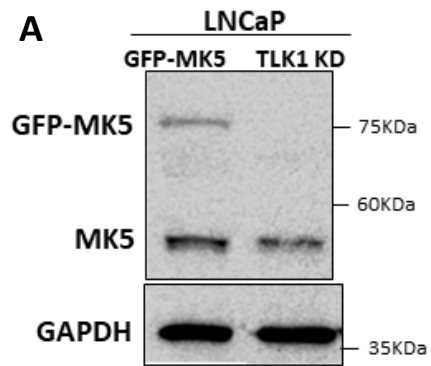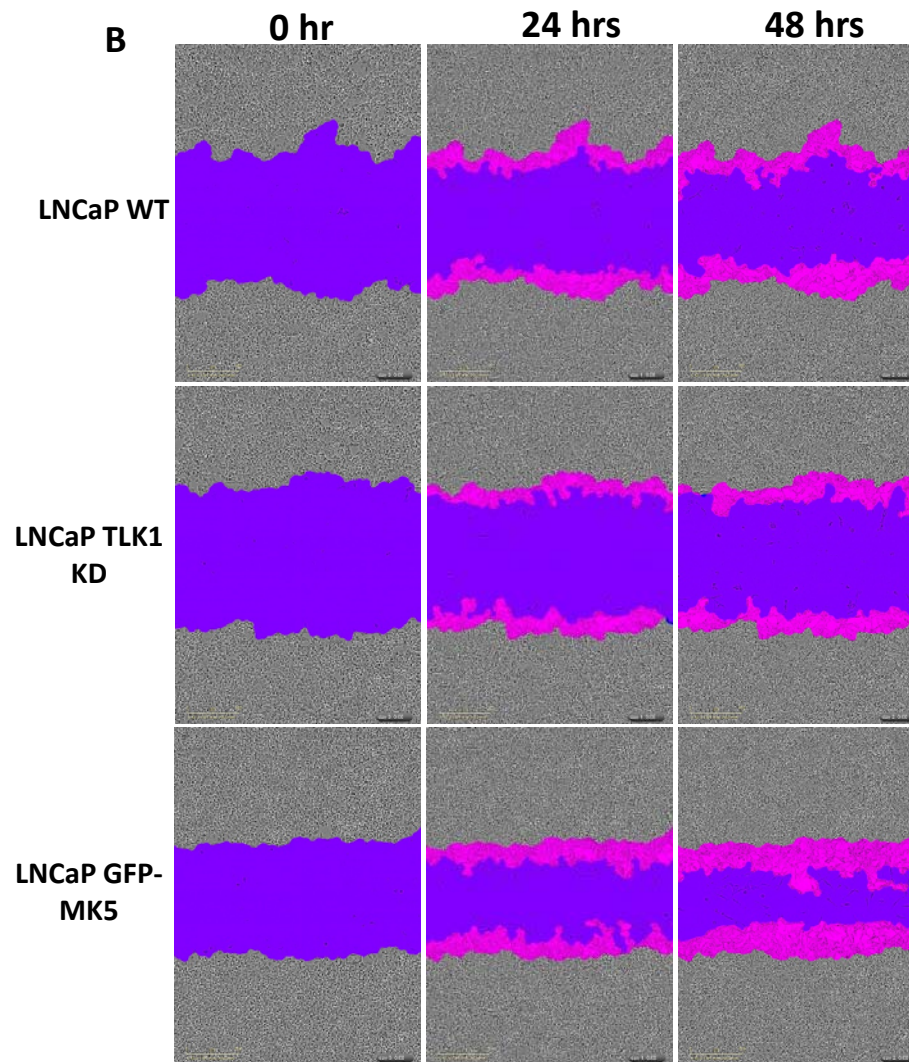

### Supplementary Figure: S8

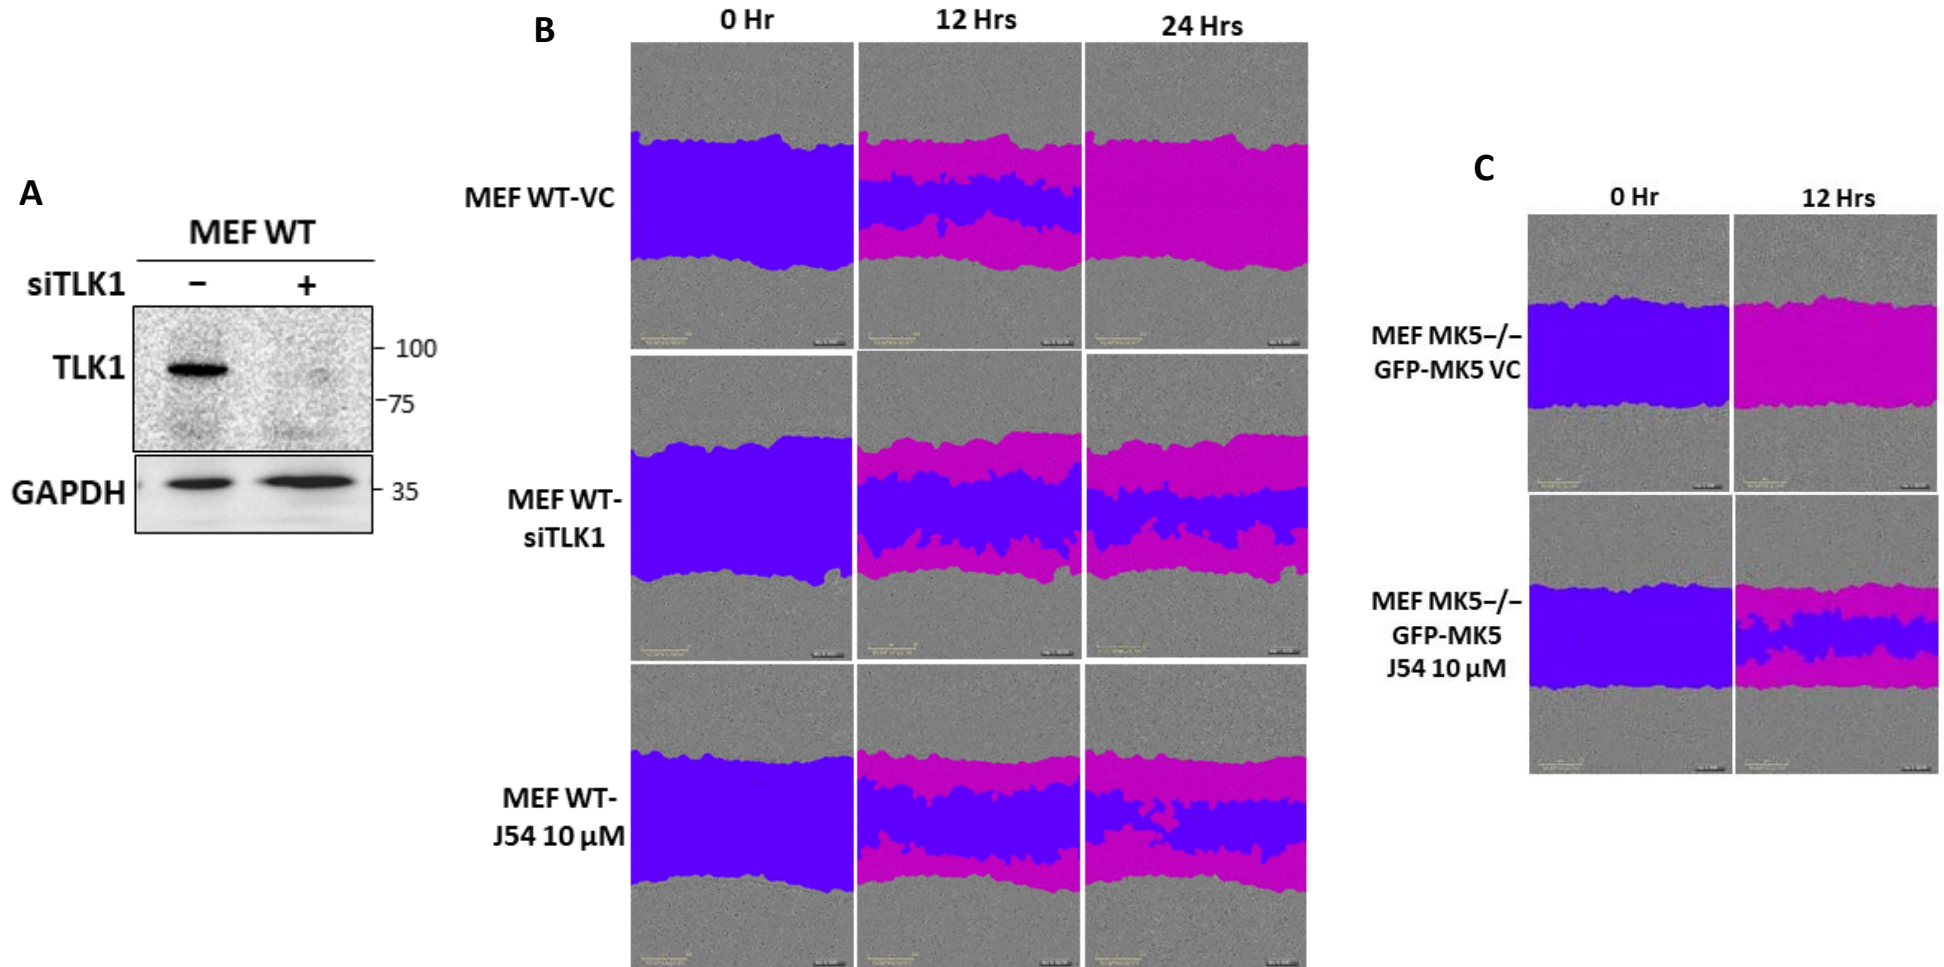



Supplementary Figure: S9

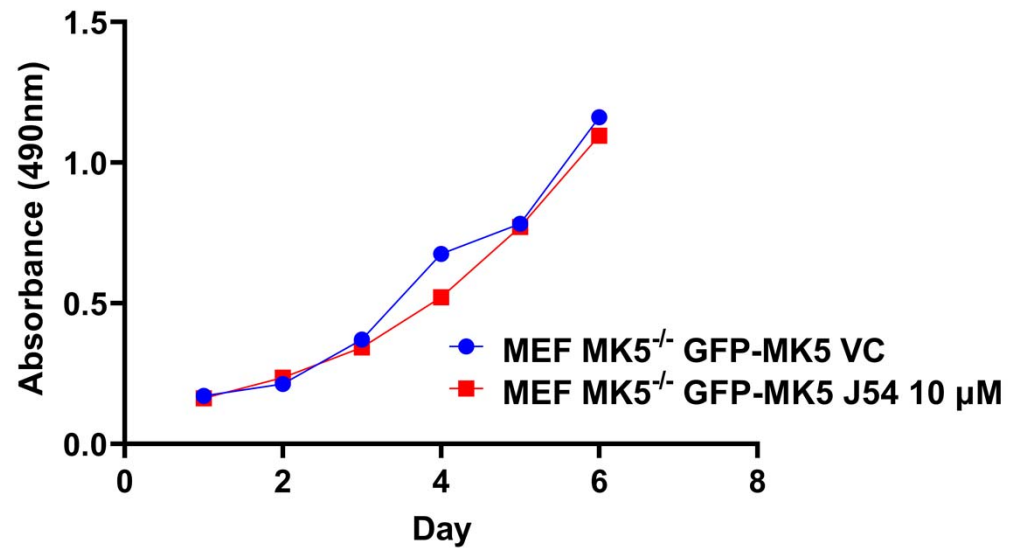

### Supplementary Figure: S10

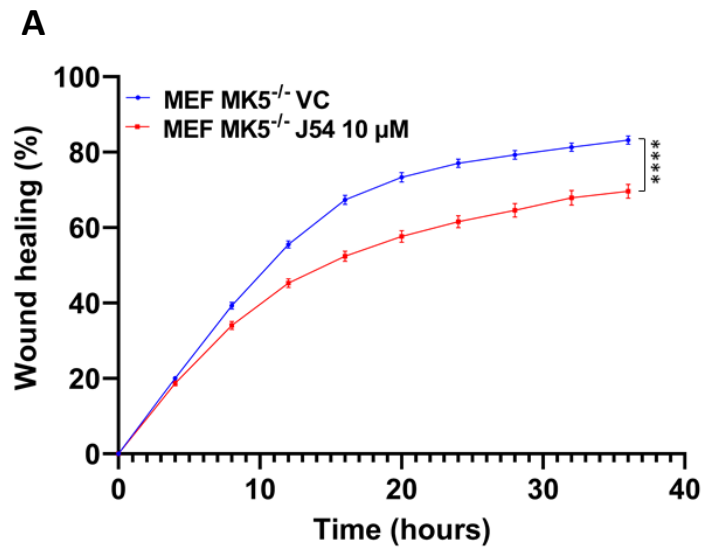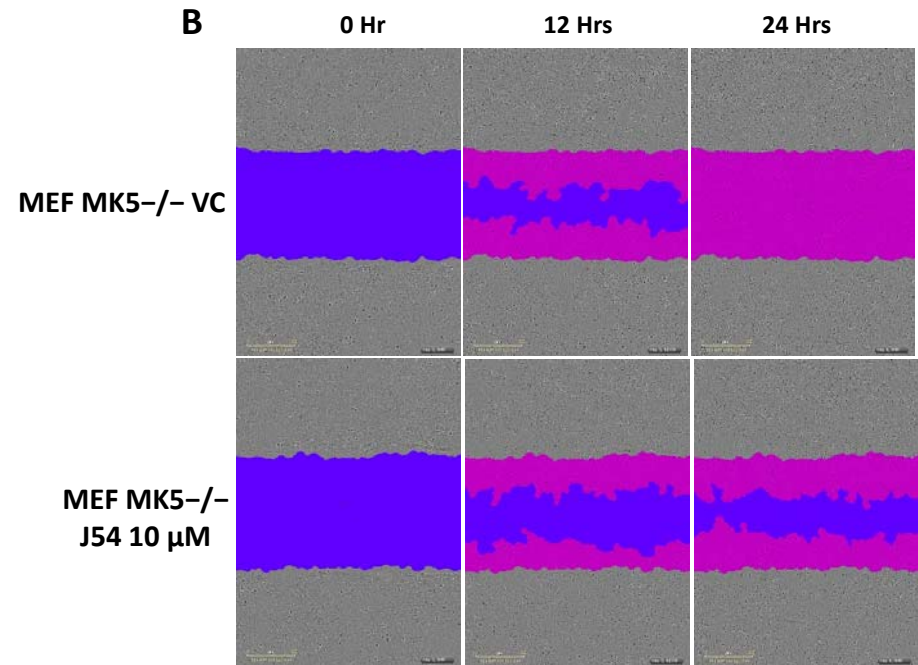

### Supplementary Figure: S11

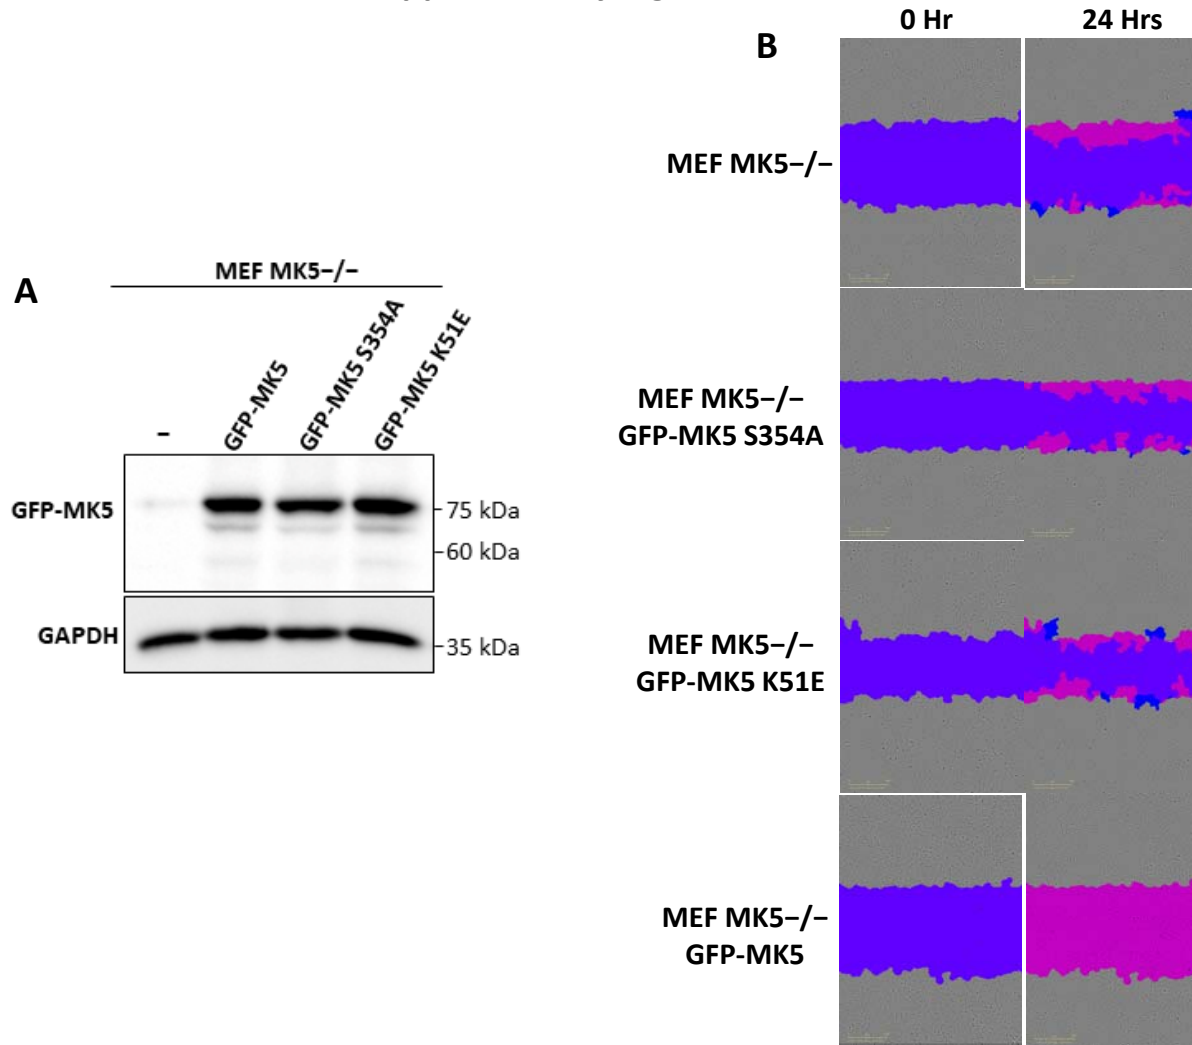

## Supplementary Figure: S12

**A**

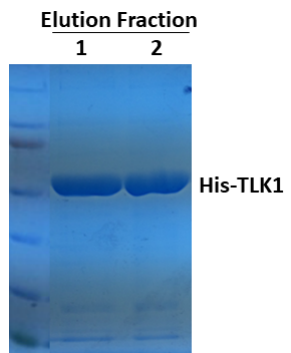

**B**

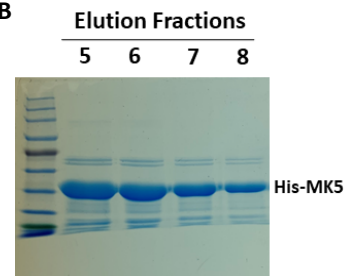

**C**

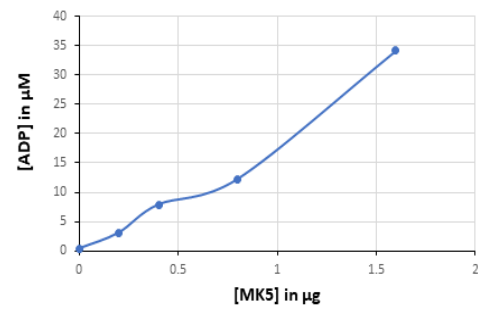

**D**

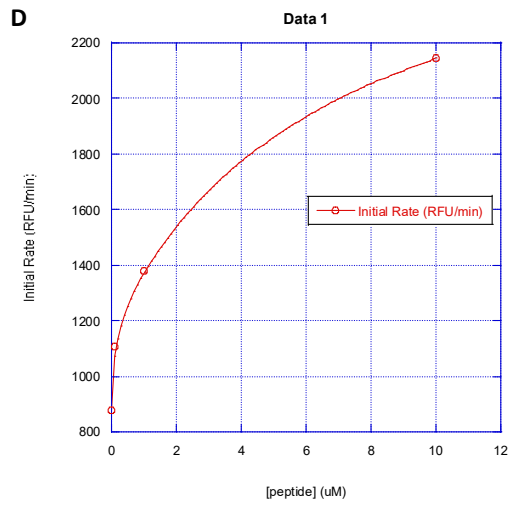

## Supplementary Figure: S13

**A** MS/MS spectrum of the phosphor-peptide  $D_{148}$ LKPENLLFKD**S**LDAPVK $_{166}$  to determine pS160

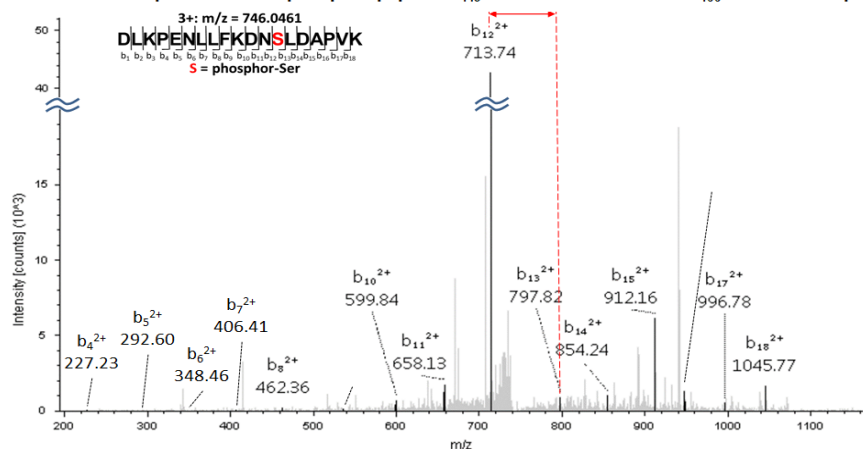

**B** MS/MS spectrum of the phosphor-peptide  $V_{347}$ SLKPLH**S**VNNPILR $_{362}$  to determine pS354

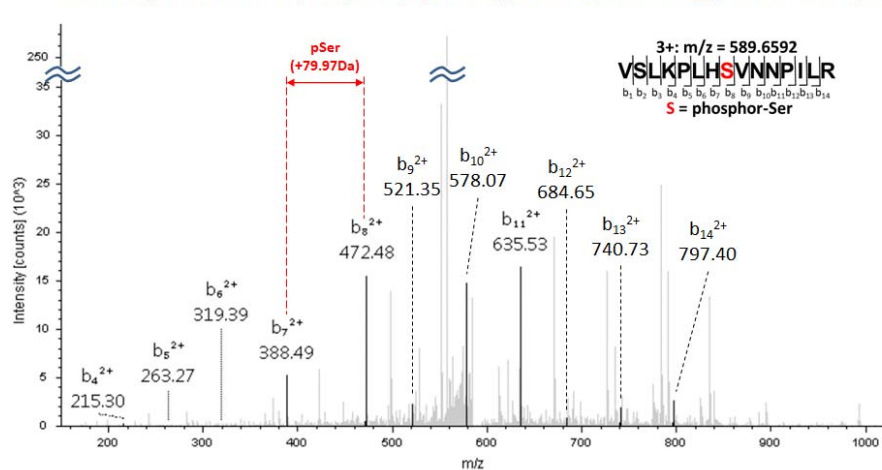

**C** MS/MS spectrum of the phosphor-peptide  $D_{372}$ SVYIHDH**S**ENGAEDSNVALEK $_{392}$  to determine pS386

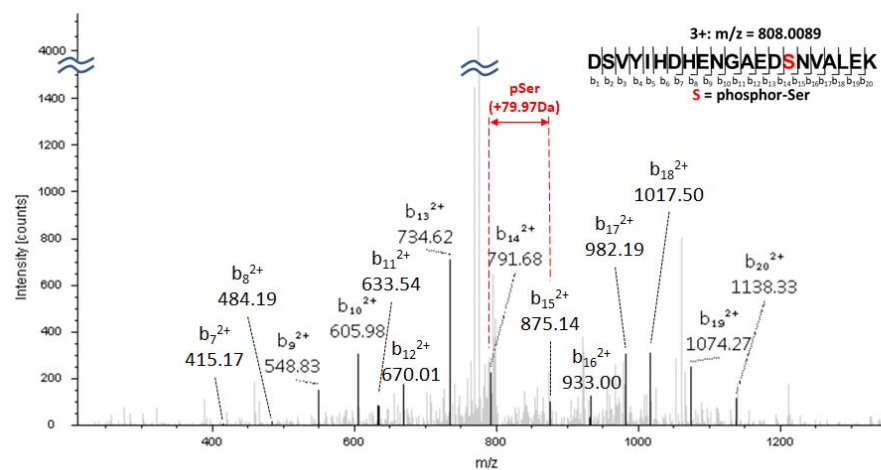

## Supplementary Figure: S14

MK5-  
Control

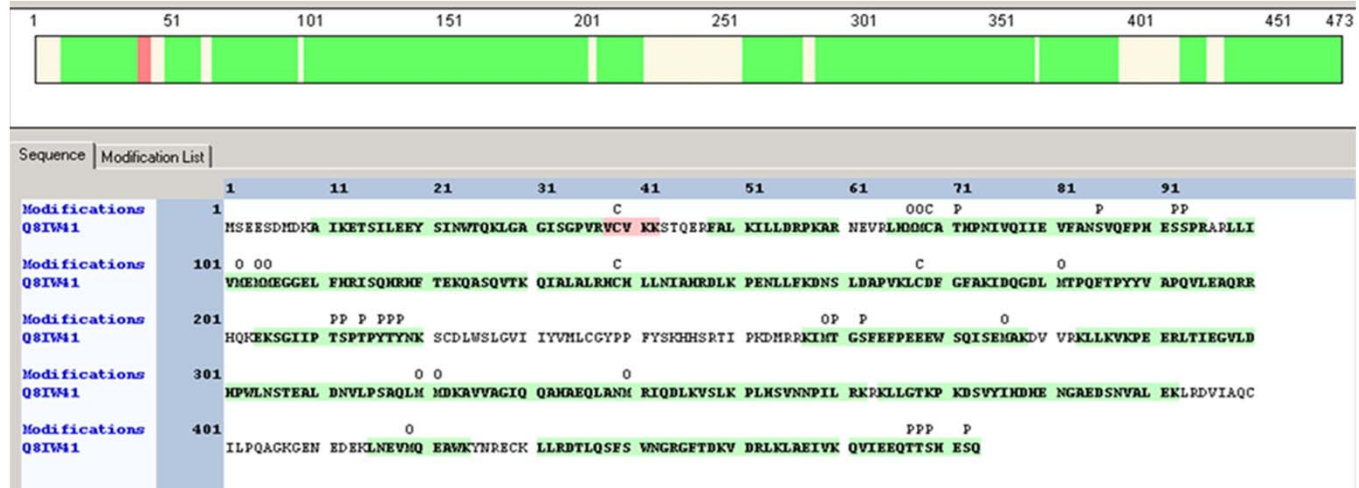

New phosphorylated sites detected in MK5-plus sample are marked with red circles.

MK5+TLK1B

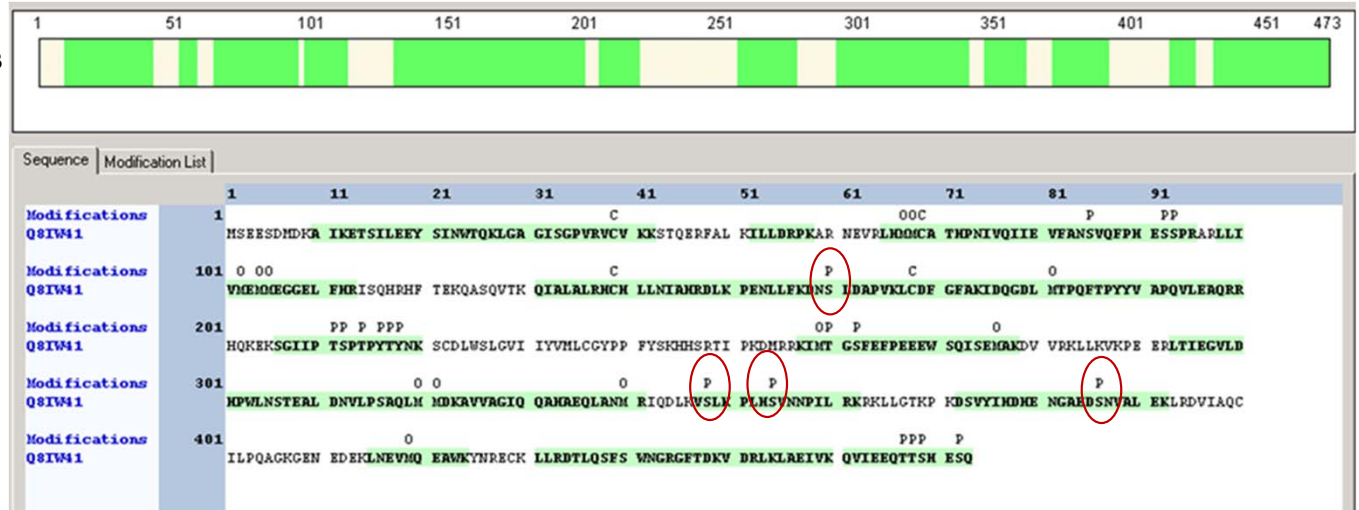

Supplementary Figure: S15

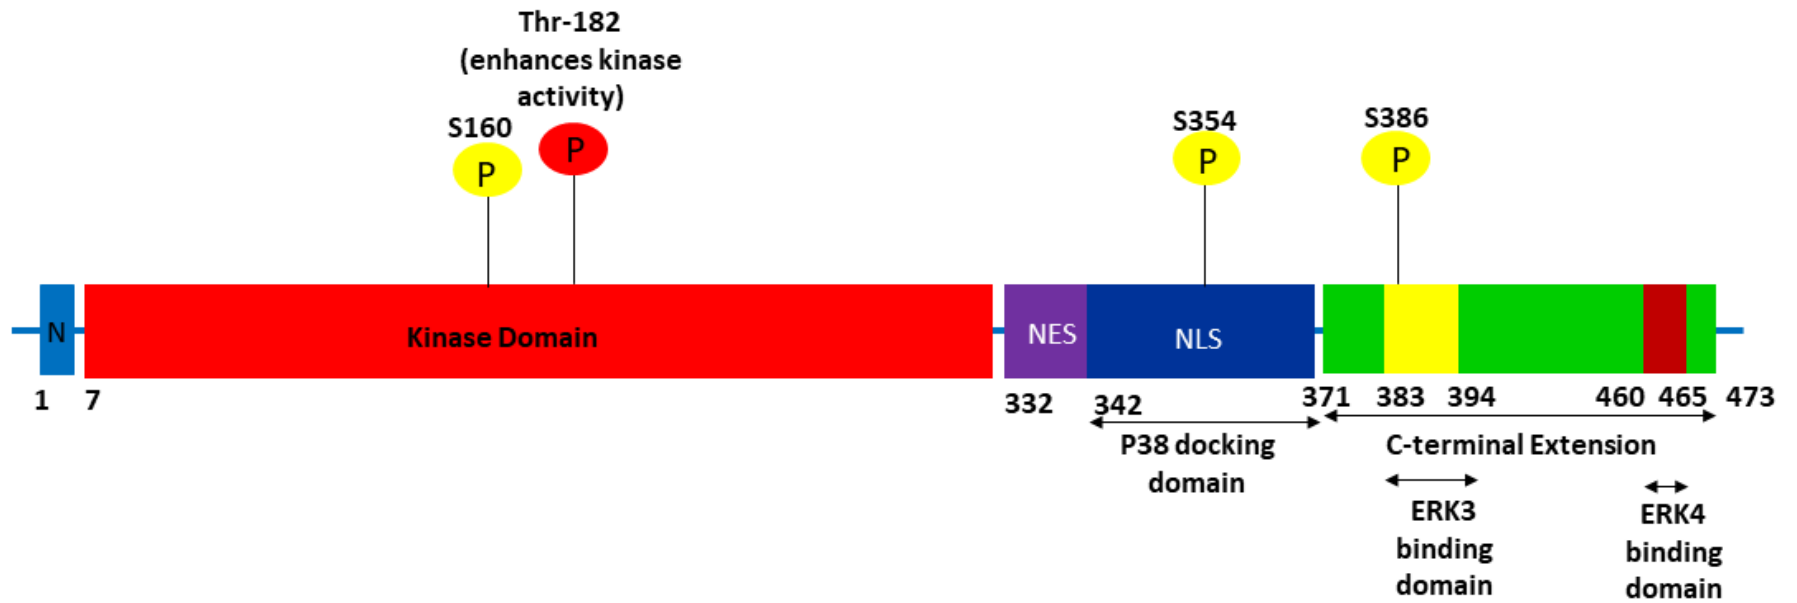

Supplementary Figure: S16

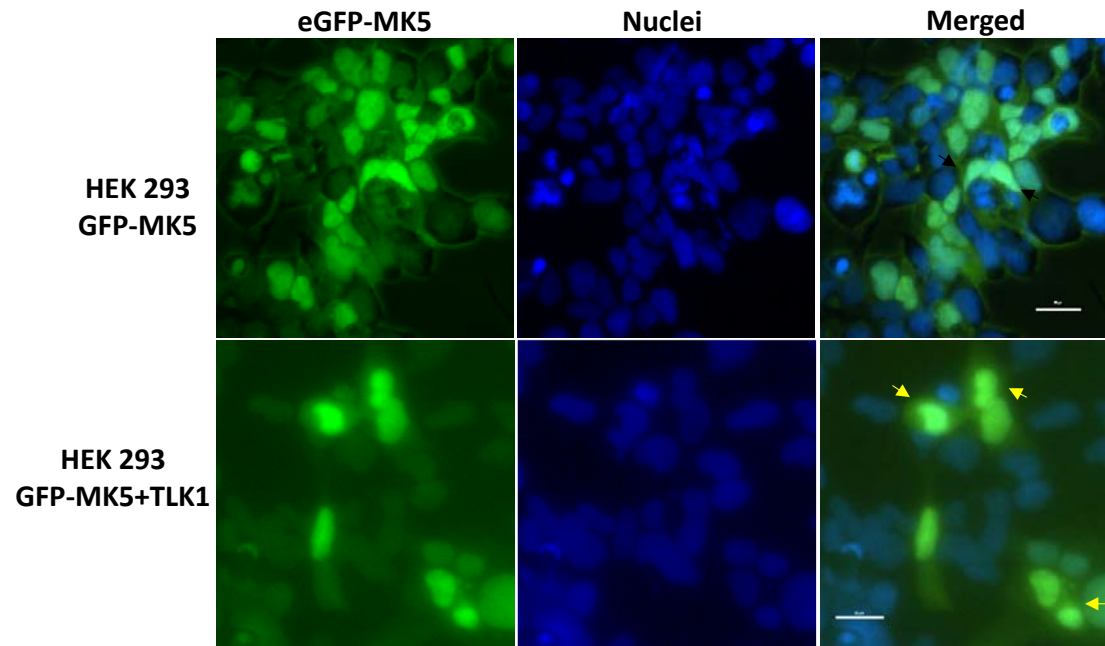



### Supplementary Figure: S17

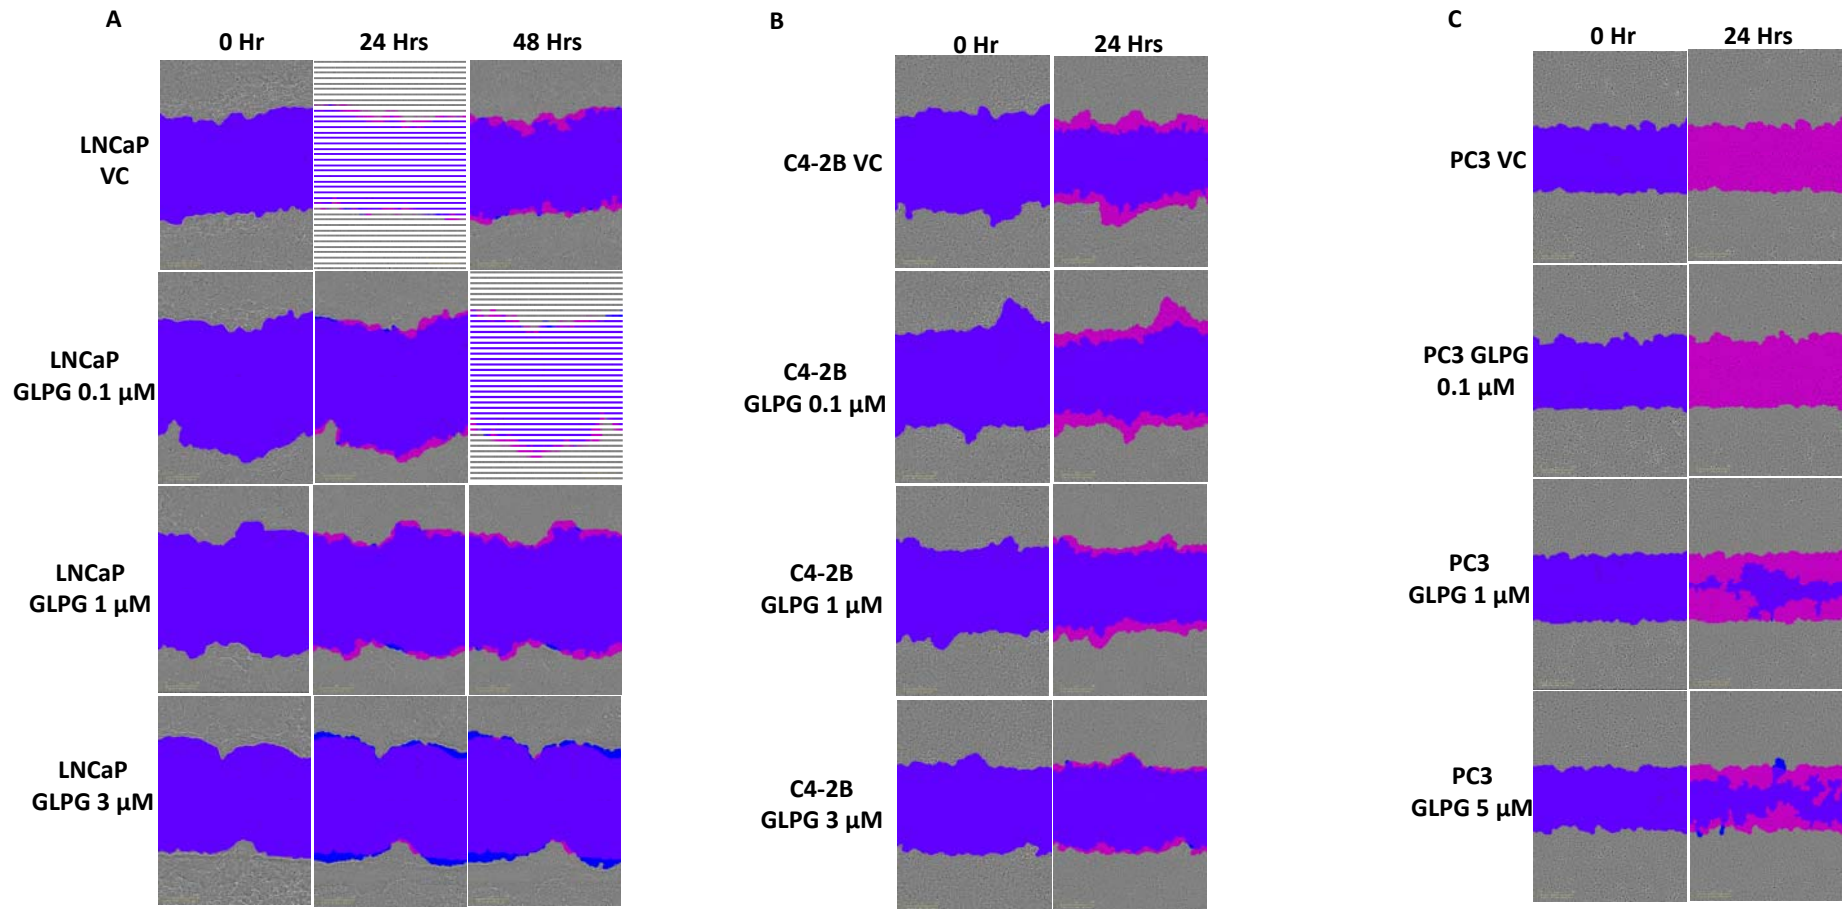

### Supplementary Figure: S17 (continued)

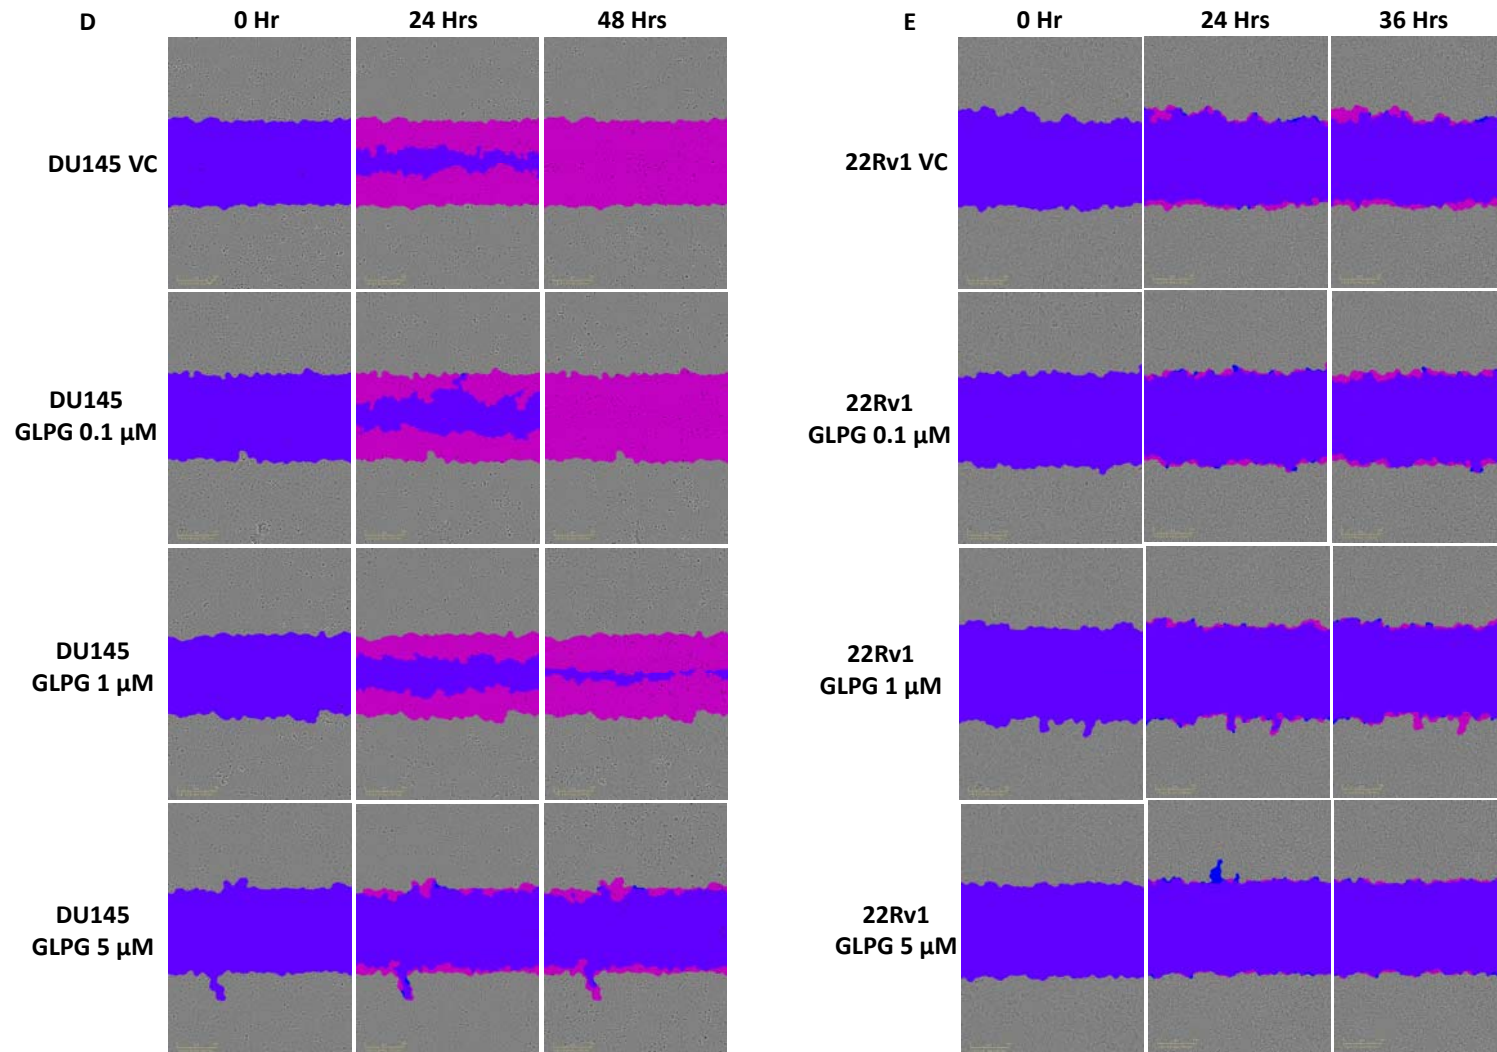

# Supplementary Figure: S18

## Effect of TLK1 expression level & Gleason score on PRAD patient survival

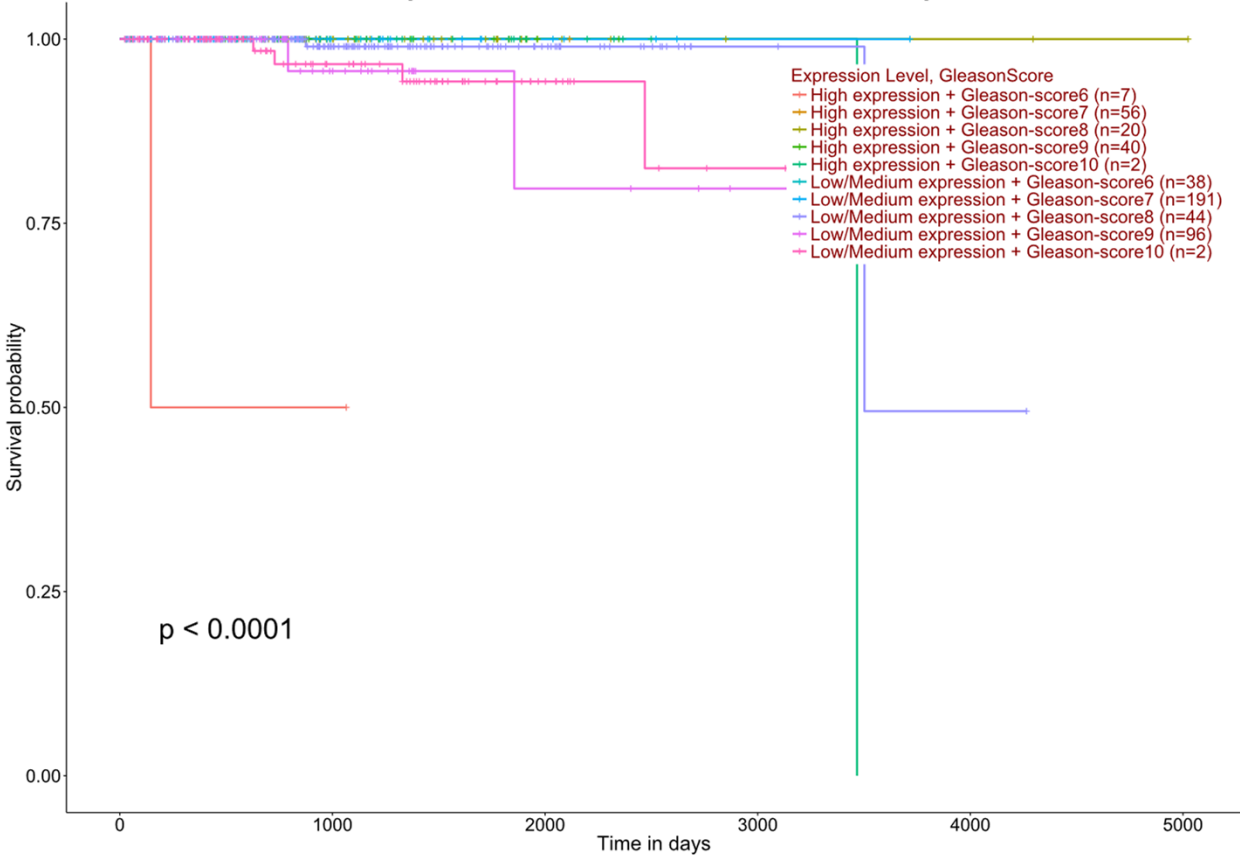

Supplement: MOL2-16-2537-s003.pdf [file MOL2-16-2537-s003.pdf]
