# Supplementary material for: TLK1‐mediated MK5‐S354 phosphorylation drives prostate cancer cell motility and may signify distinct pathologies
Source: PubMed Central journal article supplement (PMC9251878; doi:10.1002/1878-0261.13183), 2022-02-03
Supplement: MOL2-16-2537-s002.pdf [file MOL2-16-2537-s002.pdf]

### Supplementary Table: 1

| Peptide                                                      | Phosphorylation Sites | MOWSE scores |
|--------------------------------------------------------------|-----------------------|--------------|
| D <sub>372</sub> SVYIHDHENGAE <b>S</b> NVALEK <sub>392</sub> | S386 (Phosp)          | 44           |
| V <sub>347</sub> SLKPLH <b>S</b> VNNPILR <sub>362</sub>      | S354 (Phosp)          | 32           |
| D <sub>148</sub> LKPENLLFKDN <b>S</b> LDAPVK <sub>166</sub>  | S160 (Phosp)          | 25           |
